# Supplementary material for: Clinical Trials in Chronic Arthritic Diseases with Underestimated Impact of Placebo Effects on Study Size Calculation
Source: MDPI journal article supplement (doi:10.3390/jcm12020429), 2023-01-05
Supplement: s1 [file s1]

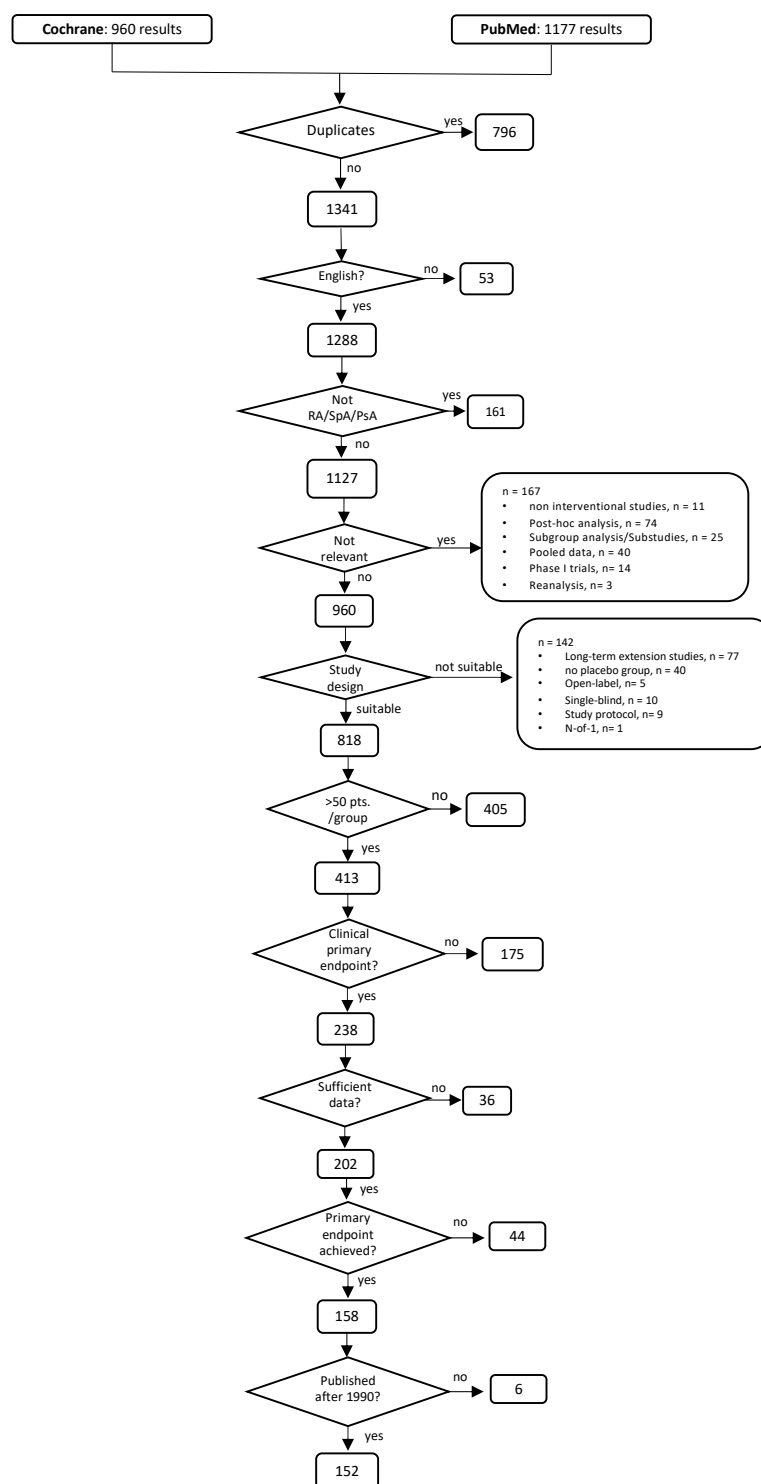

**Figure S1.** Flow-chart describing the main steps in the selection process of publications from the systematic literature search to the publications considered eligible for further analysis.

**Table S1.** List of clinical primary endpoints used for the selection of eligible studies conducted in rheumatoid arthritis (RA), psoriatic arthritis (PsA) and axial spondyloarthritis (SpA).

| Disease                          | Clinical primary endpoints                                                                                                                                                                                                                                                                                                                                                                                                              |
|----------------------------------|-----------------------------------------------------------------------------------------------------------------------------------------------------------------------------------------------------------------------------------------------------------------------------------------------------------------------------------------------------------------------------------------------------------------------------------------|
| <b>Rheumatoid arthritis (RA)</b> | ACR20 / ACR50 / ACR70 = American College of Rheumatology response scores<br>CDAI = clinical disease activity index<br>DAS = disease activity score (referred to 44 joints)<br>DAS28 = disease activity score (referred to 28 joints)<br>DAS28-CRP = DAS28 with C-reactive protein<br>DAS28-ESR = DAS28 with Erythrocyte Sedimentation Rate<br>Pain on VAS (1-10 cm)<br>Remission (Pinal criteria)<br>Ritchie Articular Index            |
| <b>Psoriatic arthritis (PsA)</b> | ACR20 / ACR50 / ACR70<br>PASI = Psoriasis Area and Severity Index<br>PSARC = Psoriatic Arthritis Response Criteria                                                                                                                                                                                                                                                                                                                      |
| <b>Spondyloarthritis (SpA)</b>   | ASAS20 / ASAS40 / ASAS5/6 / ASAS70 = Assessment of SpA international Society response criteria<br>BASDAI = Bath's Ankylosing Spondylitis Disease Activity Index<br>BASFI = Bath's Ankylosing Spondylitis Functional Index<br>BAS-G = Bath Ankylosing Spondylitis Patient Global Score<br>MASES = Maastricht Ankylosing Spondylitis Enthesitis Score<br>Pain on VAS (1-10 cm)<br>PSpARC = Peripheral Spondyloarthritis Response Criteria |

6  
7

8

**Table S2.** List of double-blind placebo-controlled randomized clinical trials, clinical trials, evaluation studies and validation studies conducted in rheumatoid arthritis (RA), psoriatic arthritis (PsA) and spondyloarthritis (SpA) retrieved after systemic literature search and selection process grouped by type of active treatment. Abbreviations: Drug Class: bDMARDs, biological disease-modifying anti-rheumatic drugs; csDMARDs, conventional synthetic disease-modifying anti-rheumatic drugs; NSAIDs, nonsteroidal anti-inflammatory drugs; tsDMARDs, targeted synthetic disease-modifying anti-rheumatic drugs. Application: iv, intravenous; po, perioral; sc, subcutaneous. Primary endpoint: ACR, American College of Rheumatology; ASAS, Assessment of SpondyloArthritis international Society; ASDAS, Ankylosing Spondylitis Diseases Activity Score; BASDAI, Bath Ankylosing Spondylitis Disease Activity Index; BASFI, Bath Ankylosing Spondylitis Functional Index; CDAI, Clinical Disease Activity Index; CRP, C-reactive Protein; DAS, Disease Activity Score; ESR, Erythrocyte Sedimentation Rate; HAQ-DI, Health Assessment Questionnaire Disability Index; PASI, Psoriasis Area and Severity Index; PGA, Physician's Global Assessment; PsARC, Psoriatic Arthritis Response Criteria; PtGA, Patient's Global Assessment; SF-36, Short-Form 36 health questionnaire; SJC, Swollen Joint Count; sLDA, sustained low disease activity; sREM, sustained remission; TJC, Tender Joint Count; VAS, Visual Analog Scales.

| RA         |                       |                        |                          |              |                  |                                      |                          |
|------------|-----------------------|------------------------|--------------------------|--------------|------------------|--------------------------------------|--------------------------|
| Drug class | Reference             | Active Compound        | Application (po, sc, iv) | Phase II/III | Duration (weeks) | Primary endpoint                     | Publication Year (Month) |
| NSAIDs     | Simon                 | Celecoxib              | po                       | III          | 12               | PtGA, PGA, Pain (VAS)                | 1999 (Nov)               |
|            | Collantes             | Etoricoxib             | po                       | III          | 12               | PtGA, PGA, TJC, SJC                  | 2002 (May)               |
|            | Furst                 | Meloxicam              | po                       | III          | 12               | SJC, TJC, PtGA, PGA, pain            | 2002 (Mar)               |
|            | Matsumoto             | Etoricoxib             | po                       | III          | 12               | PtGA, PGA, TJC, SJC                  | 2002 (Aug)               |
|            | Williams              | Valdecoxib             | po                       | III          | 12               | ACR20, TJC, PJC, SJC, PtGA, PGA      | 2006 (Feb)               |
|            | Greenwald             | Etoricoxib             | po                       | III          | 12               | ACR20                                | 2011 (Oct)               |
|            | Bickham               | Etoricoxib             | po                       | III          | 12               | DAS28-CRP                            | 2016 (Aug)               |
|            | Gibofsky              | Valdecoxib             | po                       | II           | 12               | ACR20                                | 2007 (Jun)               |
|            | Geusens               | Lumiracoxib            | po                       | II           | 26               | ACR20                                | 2004 (Nov)               |
| csDMARDs   | Strand                | Leflunomide            | po                       | II           | 52               | ACR20                                | 1999 (Nov)               |
|            | Smolen                | Leflunomide            | po                       | III          | 24               | TJC, SJC, PtGA, PGA                  | 1999 (Jan)               |
|            | Mladenovic            | Leflunomide            | po                       | II           | 24               | TJC, SJC, TJS, SJS                   | 1995 (Nov)               |
|            | Kremer                | Leflunomide            | po                       | II           | 24               | ACR20                                | 2002 (Nov)               |
|            | HERA Study Group      | Hydroxychloroquine     | po                       | II           | 36               | Pain (VAS), PtGA, PGA, grip strength | 1995 (Feb)               |
|            | Edwards               | Methotrexate           | po                       | III          | 60               | DAS                                  | 2018 (Jan)               |
|            | O'Dell                | MTX, SSZ, HCQ          | po                       | III          | 104              | ACR20                                | 2002 (May)               |
|            | Capell (MASCOT)       | MTX, SSZ               | po                       | III          | 24               | DAS                                  | 2007 (Feb)               |
| bDMARDs    | Nishimoto             | MRA (anti-IL-6-AB)     | iv                       | II           | 12               | ACR20                                | 2004 (Jun)               |
|            | Rigby (STAGE)         | Ocrelizumab            | iv                       | III          | 48               | ACR20                                | 2012 (Feb)               |
|            | Furst (DOSEFLEX)      | Certolizumab pegol     | sc                       | III          | 34               | ACR20                                | 2015 (Feb)               |
|            | Weinblatt (REALISTIC) | Certolizumab pegol     | sc                       | III          | 12               | ACR20                                | 2012 (Dec)               |
|            | Smolen (CERTAIN)      | Certolizumab pegol     | sc                       | III          | 24               | CDAI                                 | 2015 (May)               |
|            | Keystone              | Adalimumab             | sc                       | III          | 52               | ACR20                                | 2004 (May)               |
|            | Burmester (FUNCTION)  | Tocilizumab            | iv                       | III          | 52               | DAS28-ESR                            | 2016 (Jun)               |
|            | Smolen (OPTION)       | Tocilizumab            | iv                       | III          | 24               | ACR20                                | 2008 (Mar)               |
|            | Cohen (REFLEX)        | Rituximab              | iv                       | III          | 24               | ACR20                                | 2006 (Sep)               |
|            | Kremer                | Abatacept              | iv                       | III          | 52               | ACR20                                | 2006 (Jun)               |
|            | Keystone              | Etanercept             | sc                       | II           | 16               | ACR20                                | 2004 (Feb)               |
| bDMARDs    | Schiff (ATTEST)       | Abatacept / Infliximab | iv                       | III          | 48               | DAS28-ESR                            | 2008 (Aug)               |
|            | Maini                 | Infliximab             | iv                       | III          | 30               | ACR20                                | 1999 (Dec)               |
|            | Smolen (PRESERVE)     | Etanercept             | sc                       | III          | 88               | DAS28 < 3.2                          | 2013 (Mar)               |
|            | Moreland              | Etanercept             | sc                       | III          | 24               | ACR20, ACR50                         | 1999 (Mar)               |
|            | Blanco                | Secukinumab            | sc                       | III          | 52               | ACR20                                | 2017 (Jun)               |
|            | Weinblatt (ARMADA)    | Adalimumab             | sc                       | II           | 24               | ACR20                                | 2003 (Jan)               |
|            | Genovese              | Abatacept              | iv                       | III          | 24               | ACR20                                | 2005 (Sep)               |
|            | Burmester             | Mavrilimumab           | sc                       | II           | 24               | DAS28-CRP, ACR20                     | 2017 (Jun)               |

|                 |                          |                    |        |        |     |                      |            |
|-----------------|--------------------------|--------------------|--------|--------|-----|----------------------|------------|
|                 | Smolen                   | Certolizumab pegol | sc     | III    | 24  | ACR20                | 2009 (Jun) |
|                 | Yazici (ROSE)            | Tocilizumab        | sc     | III    | 24  | ACR50                | 2012 (Feb) |
|                 | St Clair                 | Infliximab         | iv     | III    | 54  | ACR-n                | 2004 (Nov) |
|                 | Weinblatt                | Fostamatinib       | sc     | III    | 52  | ACR20                | 2014 (Dec) |
|                 | Genovese                 | Decernotinib       | sc     | II     | 24  | ACR20, DAS28-CRP     | 2016 (Jan) |
|                 | Cohen                    | Anakinra           | sc     | II     | 24  | ACR20                | 2004 (Sep) |
|                 | Emery (SERENE)           | Rituximab          | iv     | III    | 48  | ACR20                | 2010 (Sep) |
|                 | Emery                    | Rituximab          | iv     | II     | 24  | ACR20                | 2006 (May) |
|                 | Mease (SUNRISE)          | Rituximab          | iv     | II     | 48  | ACR20, DAS28         | 2010 (May) |
|                 | Cohen                    | Anakinra           | sc     | II     | 24  | ACR20                | 2002 (Mar) |
|                 | Takeuchi (SIRROUND-D)    | Sirukumab          | sc     | III    | 52  | ACR20                | 2017 (Dec) |
|                 | Genovese                 | Fostamatinib       | sc     | III    | 24  | ACR20                | 2014 (Nov) |
|                 | Horslev-Petersen (OPERA) | Adalimumab         | sc     | III    | 48  | DAS28-CRP < 3.2      | 2014 (Apr) |
|                 | Stohl                    | Belimumab          | iv     | II     | 48  | ACR20                | 2013 (May) |
|                 | Bresnihan                | IL-1-R-Antagonist  | sc     | II     | 24  | ACR criteria         | 1998 (Dec) |
|                 | Alten                    | Canakinumab        | sc, iv | II     | 12  | ACR50                | 2011 (Jul) |
|                 | Genovese (MOBILITY)      | Sarilumab          | sc     | III    | 52  | ACR20                | 2015 (Jun) |
|                 | Smolen (GO-AFTER)        | Golimumab          | sc     | III    | 84  | ACR20                | 2009 (Jul) |
|                 | Ostergaard               | Ofatumumab         | iv     | II     | 24  | ACR20, DAS28, EULAR  | 2010 (Aug) |
|                 | Weinblatt                | Clazakizumab       | sc     | II     | 24  | ACR20                | 2015 (Oct) |
|                 | Genovese (TOWARD)        | Tocilizumab        | iv     | III    | 24  | ACR20 (24W)          | 2008 (Oct) |
|                 | Nishimoto (SATORI)       | Tocilizumab        | iv     | III    | 24  | ACR criteria, DAS-28 | 2009       |
|                 | Damjanov                 | SBI-087            | sc     | II     | 24  | ACR20                | 2016 (Dec) |
|                 | Emery (RADIATE)          | Tocilizumab        | iv     | III    | 24  | ACR20                | 2008 (Nov) |
|                 | Kivitz (BREVACTA)        | Tocilizumab        | iv     | III    | 24  | ACR20                | 2014 (Nov) |
| <b>bDMARDs</b>  |                          |                    |        |        |     |                      |            |
|                 | Emery                    | Certolizumab pegol | sc     | III    | 52  | sREM, sLDA           | 2017 (Jan) |
|                 | Weinblatt                | Certolizumab pegol | sc     | III    | 52  | DAS28-ESR < 3.2      | 2017 (Oct) |
|                 | Kavanaugh (OPTIMA)       | Adalimumab         | sc     | III    | 26  | DAS28-CRP < 3.2      | 2013 (Jan) |
|                 | Aletaha                  | Sirukumab          | sc     | III    | 52  | ACR20                | 2017 (Mar) |
|                 | Yamamoto (J-RAPID)       | Certolizumab pegol | sc     | III    | 24  | ACR20                | 2014 (Sep) |
|                 | Yamamoto (HIKARI)        | Certolizumab pegol | sc     | III    | 24  | ACR20                | 2014 (Jul) |
|                 | Weinblatt (GO-FURTHER)   | Golimumab          | sc     | III    | 24  | ACR20                | 2013 (Mar) |
|                 | Takeuchi (GO-MONO)       | Golimumab          | sc     | II/III | 24  | ACR20                | 2013 (Sep) |
|                 | Kremer                   | Abatacept          | iv     | II     | 48  | ACR20                | 2005 (Aug) |
|                 | Kim                      | Infliximab         | iv     | III    | 30  | ACR20                | 2013 (Dec) |
|                 | Keystone                 | CZP                | sc     | III    | 52  | ACR20                | 2008 (Nov) |
|                 | Huizinga                 | Sarilumab          | sc     | II     | 12  | ACR20                | 2014 (Sep) |
|                 | Taylor                   | Ofatumumab         | iv     | III    | 24  | ACR20                | 2011 (Dec) |
|                 | Miyasaka (CHANGE)        | Adalimumab         | sc     | II/III | 24  | ACR20                | 2008       |
|                 | Tanaka (GO-FURTH)        | Golimumab          | sc     | II/III | 16  | ACR20                | 2012 (Jun) |
|                 | Fleischmann (FAST4WARD)  | CZP                | sc     | III    | 24  | ACR20                | 2009 (Jun) |
|                 | Li                       | Golimumab          | sc     | III    | 56  | ACR20                | 2016 (Nov) |
|                 | van de Putte             | Adalimumab         | sc     | III    | 26  | ACR20                | 2004 (May) |
|                 | Fan                      | Leining            | iv     | II     | 24  | ACR20                | 2014 (Nov) |
|                 | Pavelka                  | Etanercept         | sc     | III    | 52  | DAS28 < 3.2          | 2017 (Sep) |
|                 | Furst                    | Pegsunercept       | sc     | II     | 12  | ACR20                | 2005 (Dec) |
|                 | Chen                     | Etanercept         | sc     | III    | 24  | ACR20                | 2016 (Sep) |
|                 | Keystone (GO-FORWARD)    | Golimumab          | sc     | III    | 24  | ACR20                | 2009 (Jun) |
|                 | Westhovens               | Abatacept          | iv     | III    | 52  | DAS28-CRP < 2.6      | 2009 (Dec) |
|                 | van de Putte             | Adalimumab         | sc     | II     | 12  | ACR20                | 2003 (Dec) |
| <b>tsDMARDs</b> |                          |                    |        |        |     |                      |            |
|                 | Burmester                | Tofacitinib        | po     | III    | 24  | ACR20, HAQ-DI, DAS   | 2013 (Feb) |
|                 | Kremer                   | Tofacitinib        | po     | II     | 24  | ACR20                | 2012 (Apr) |
|                 | Tanaka                   | Tofacitinib        | po     | II     | 12  | ACR20                | 2015 (Jul) |
|                 | van der Heijde           | Tofacitinib        | po     | III    | 104 | ACR20                | 2013 (Mar) |
|                 | Kremer                   | Tofacitinib        | po     | II     | 52  | ACR20                | 2013 (Aug) |
|                 | Kremer                   | Upadacitinib       | po     | II     | 12  | ACR20                | 2016 (Dec) |
| <b>tsDMARDs</b> |                          |                    |        |        |     |                      |            |
|                 | Takeuchi                 | Peficitinib        | po     | II     | 12  | ACR20                | 2016 (Jun) |

|                 |                         |                    |    |     |     |                              |            |
|-----------------|-------------------------|--------------------|----|-----|-----|------------------------------|------------|
| others          | Genovese                | Peficitinib        | po | II  | 12  | ACR20                        | 2017 (May) |
|                 | Kremer                  | Tofacitinib        | po | II  | 12  | ACR20                        | 2009 (Jul) |
|                 | Westhovens (DARWIN 1)   | Filgotinib         | po | II  | 24  | ACR20                        | 2017 (Jun) |
|                 | Kavanaugh (DARWIN 2)    | Filgotinib         | po | II  | 24  | ACR20                        | 2017 (Jun) |
|                 | Kivitz                  | Peficitinib        | po | II  | 12  | ACR20                        | 2017 (Apr) |
|                 | Taylor                  | Baricitinib        | po | III | 52  | ACR20                        | 2017 (Feb) |
|                 | Kondo                   | Tacrolimus         | po | II  | 16  | ACR20                        | 2004 (Feb) |
|                 | Bruyn                   | Everolimus         | po | II  | 12  | ACR20                        | 2008 (Aug) |
|                 | Yocum                   | Tacrolimus         | po | III | 24  | ACR20                        | 2003 (Dec) |
|                 | Tugwell                 | Cyclosporine       | po | II  | 48  | TJC                          | 1995 (Jul) |
|                 | Furst                   | Tacrolimus         | po | II  | 24  | ACR20, TJC, SJC              | 2002 (Aug) |
|                 | McCarey (TARA)          | Atorvastatin       | po | III | 24  | DAS28                        | 2004 (Jun) |
|                 | Ogrendik                | Ornidazole         | po | II  | 12  | ACR                          | 2006 (Oct) |
|                 | Buttgereit (CAPRA-2)    | Prednisone         | po | III | 12  | ACR20                        | 2013 (Feb) |
|                 | Ogrendik                | Roxithromycin      | po | II  | 24  | ACR20                        | 2011 (Sep) |
|                 | Liu                     | TLHS               | po | II  | 8   | ACR20                        | 2016 (Jul) |
|                 | Hetland                 | Cyclosporine       | po | III | 52  | ACR20                        | 2006 (May) |
| <b>csDMARDs</b> |                         |                    |    |     |     |                              |            |
| bDMARDs         | Kaltwasser              | Leflunomide        | po | II  | 24  | PsARC                        | 2004 (Jun) |
|                 | Clegg                   | Sulfasalazine      | po | II  | 36  | TJC, PJC, PtGA, PGA          | 1996 (Dec) |
|                 | McInnes                 | Secukinumab        | sc | III | 54  | ACR20                        | 2015 (Sep) |
|                 | Kavanaugh (PALACE-1)    | Apremilast         | po | III | 24  | ACR20                        | 2014 (Jun) |
|                 | McInnes (PSUMMIT-1)     | Ustekinumab        | sc | III | 24  | ACR20                        | 2013 (Aug) |
|                 | Kavanaugh               | Golimumab          | sc | III | 20  | ACR20, PASI, SF-36           | 2009 (Apr) |
|                 | Ritchlin                | Ustekinumab        | sc | III | 40  | ACR20                        | 2014 (Jun) |
|                 | Mease (RAPID-PsA)       | Certolizumab pegol | sc | III | 24  | ACR20                        | 2014 (Jan) |
|                 | Gottlieb                | Ustekinumab        | sc | II  | 12  | ACR20                        | 2009 (Feb) |
|                 | Mease                   | Brodalumab         | sc | II  | 12  | ACR20                        | 2014 (Jun) |
|                 | Antoni (IMPACT 2)       | Infliximab         | iv | III | 24  | ACR20                        | 2005 (Aug) |
|                 | Mease                   | Adalimumab         | sc | II  | 24  | ACR20                        | 2005 (Oct) |
|                 | Antoni (IMPACT)         | Infliximab         | iv | III | 50  | ACR20                        | 2005 (Apr) |
|                 | Mease                   | Alefacept          | iv | II  | 24  | ACR20                        | 2006 (May) |
|                 | Schett                  | Apremilast         | po | II  | 28  | ACR20                        | 2012 (Oct) |
|                 | Mease                   | Etanercept         | sc | II  | 24  | ACR20                        | 2004 (Jul) |
|                 | Nash (SPIRIT-P2)        | Ixekizumab         | sc | III | 24  | ACR20                        | 2017 (Jun) |
|                 | Mease (SPIRIT-P1)       | Ixekizumab         | sc | III | 24  | ACR20                        | 2017 (Jan) |
| tsDMARDs        | Kavanaugh (GO-VIBRANT)  | Golimumab          | sc | III | 124 | ACR20                        | 2017 (Nov) |
|                 | Mease                   | Abatacept          | sc | III | 24  | ACR20                        | 2017 (Sep) |
|                 | Edwards (PALACE-3)      | Apremilast         | po | III | 52  | ACR20                        | 2016 (Jun) |
|                 | Cutolo (PALACE-2)       | Apremilast         | po | III | 52  | ACR20                        | 2016 (Sep) |
|                 | Nakagawa                | Brodalumab         |    | II  | 12  | PASI                         | 2016 (Jan) |
|                 | Gladman                 | Tofacitinib        | po | III | 24  | ACR20                        | 2017 (Oct) |
| <b>NSAIDs</b>   |                         |                    |    |     |     |                              |            |
| bDMARDs         | Dougados                | Celecoxib          | po | III | 6   | Pain (VAS), BASFI            | 2001 (Jan) |
|                 | van der Heijde          | Etoricoxib         | po | II  | 52  | Back pain (VAS), PtGA, BASFI | 2005 (Apr) |
|                 | Barkhuizen              | Celecoxib          | po | II  | 12  | Pain, PtGA, BASFI            | 2006 (Sep) |
|                 | Landewé (RAPID-axSpA)   | Certolizumab pegol | sc | III | 24  | ASAS20                       | 2014 (Jan) |
|                 | Inman                   | Golimumab          | sc | III | 24  | ASAS20                       | 2008 (Nov) |
|                 | Sieper (INFAST)         | Infliximab         | iv | III | 28  | ASAS                         | 2014 (Jan) |
|                 | Dougados                | Etanercept         | sc | III | 12  | ASAS40                       | 2014 (Aug) |
|                 | Davis                   | Etanercept         | sc | II  | 24  | ASAS20                       | 2003 (Nov) |
|                 | van der Heijde (ASSERT) | Infliximab         | iv | II  | 24  | ASAS20                       | 2005 (Feb) |
|                 | Sieper (ABILITY-1)      | Adalimumab         | sc | III | 12  | ASAS40                       | 2013 (Jun) |
|                 | van der Heijde          | Adalimumab         | sc | II  | 24  | ASAS20                       | 2006       |
|                 | Mease (ABILITY-2)       | Adalimumab         | sc | III | 156 | PsARC40                      | 2015 (Apr) |
|                 | Sieper                  | Golimumab          | sc | III | 16  | ASAS20                       | 2015 (Oct) |

|                 |                     |             |    |     |     |                            |            |
|-----------------|---------------------|-------------|----|-----|-----|----------------------------|------------|
| <i>tsDMARDs</i> | Revicki (ATLAS)     | Adalimumab  | sc | III | 284 | Back pain (VAS),<br>BASDAI | 2008 (Jul) |
|                 | Bao                 | Golimumab   | sc | III | 24  | ASAS20                     | 2014 (Sep) |
|                 | Huang               | Adalimumab  | sc | III | 12  | ASAS20                     | 2014 (Mar) |
|                 | Landewé (ABILITY-3) | Adalimumab  | sc | III | 68  | ASDAS ≥2.1                 | 2018 (Jul) |
|                 | van der Heijde      | Tofacitinib | po | II  | 16  | ASAS20                     | 2017 (Aug) |

**Table S3.** Significant correlations between clinical endpoints and baseline characteristics of placebo (PBO) groups of studies conducted in rheumatoid arthritis (RA), with  $p > 0.001$  and  $|r| > 0.3$ .  $r$ , Pearson correlation index; n.s., not significant.

| Correlations                          |     |               |               |               |
|---------------------------------------|-----|---------------|---------------|---------------|
|                                       |     | ACR20 PBO (%) | ACR50 PBO (%) | ACR70 PBO (%) |
| ACR20 active comparator (%)           | $r$ | 0.682***      | 0.679***      | 0.569***      |
| ACR50 active comparator (%)           | $r$ | 0.775***      | 0.833***      | 0.737***      |
| ACR70 active comparator (%)           | $r$ | 0.647***      | 0.807***      | 0.811***      |
| Mean age (years)                      | $r$ | -0.423***     | -0.451***     | -0.378***     |
| Disease duration (years)              | $r$ | -0.513***     | -0.676***     | -0.624***     |
| RA < 2 years (%)                      | $r$ | 0.845***      | 0.986***      | 0.985***      |
| Concomitant steroids (%)              | $r$ | n.s.          | -0.379***     | -0.323***     |
| Concomitant MTX (%)                   | $r$ | 0.319***      | n.s.          | n.s.          |
| Any concomitant DMARDs (%)            | $r$ | 0.351***      | 0.626***      | n.s.          |
| Prior DMARDs (%)                      | $r$ | -0.804***     | -0.848***     | -0.611***     |
| DMARDs-naïve (%)                      | $r$ | 0.899***      | 0.930***      | 0.922***      |
| Prior MTX (%)                         | $r$ | -0.712***     | -0.626***     | 0.889***      |
| Prior anti-TNF (%)                    | $r$ | -0.436***     | -0.430***     | n.s.          |
| Prior bDMARDs other than anti-TNF (%) | $r$ | -0.304***     | -0.358***     | -0.364***     |
| Study duration (weeks)                | $r$ | 0.537***      | 0.695***      | 0.638***      |

29

30

**Table S4.** Significant correlations between clinical endpoints and baseline characteristics of placebo (PBO) groups of studies conducted in psoriatic arthritis (PsA), with  $p > 0.001$  and  $|r| > 0.3$ . r, Pearson correlation index; n.s., not significant.

|                                       |   | Correlations  |               |               |
|---------------------------------------|---|---------------|---------------|---------------|
|                                       |   | ACR20 PBO (%) | ACR50 PBO (%) | ACR70 PBO (%) |
| ACR20 active comparator (%)           | r | 0.304***      | n.s.          | n.s.          |
| ACR50 active comparator (%)           | r | n.s.          | n.s.          | n.s.          |
| ACR70 active comparator (%)           | r | 0.322***      | n.s.          | n.s.          |
| Participants in PBO group (n)         | r | 0.489***      | n.s.          | 0.301***      |
| Female (%)                            | r | 0.507***      | 0.596***      | 0.537***      |
| Caucasian (%)                         | r | 0.427***      | -0.315***     | -0.427***     |
| Duration of PsA (years)               | r | -0.310***     | n.s.          | n.s.          |
| Duration of psoriasis (years)         | r | -0.412***     | n.s.          | n.s.          |
| Enthesitis (%)                        | r | 0.341***      | n.s.          | n.s.          |
| Dactylitis (%)                        | r | n.s.          | -0.308***     | n.s.          |
| Concomitant NSAIDs (%)                | r | n.s.          | -0.363***     | 0.572***      |
| Concomitant steroids (%)              | r | 0.512***      | 0.348***      | 0.430***      |
| Concomitant MTX (%)                   | r | 0.421***      | 0.464***      | 0.574***      |
| Concomitant DMARDs other than MTX (%) | r | 0.609***      | 0.862***      | 0.964***      |
| Any concomitant DMARDs                | r | n.s.          | 0.833***      | 0.869***      |
| Prior DMARDs (%)                      | r | n.s.          | -0.739***     | -0.484***     |
| Prior anti-TNF (%)                    | r | 0.689***      | 0.552***      | 0.536***      |
| Any bDMARDs prior (%)                 | r | -0.392***     | n.s.          | -0.905**      |
| Study duration (weeks)                | r | 0.389***      | n.s.          | n.s.          |
| Publication year                      | r | 0.536***      | 0.503***      | 0.547***      |



**Table S5.** Significant correlations between clinical endpoints and baseline characteristics of placebo (PBO) groups of studies conducted in spondyloarthritis (SpA), with  $p > 0.001$  and  $|r| > 0.3$ . r, Pearson correlation index; n.s., not significant.

|                                              |   | Correlations   |                |                 |                         |
|----------------------------------------------|---|----------------|----------------|-----------------|-------------------------|
|                                              |   | ASAS20 PBO (%) | ASAS40 PBO (%) | ASAS5/6 PBO (%) | ASAS part. rem. PBO (%) |
| ASAS20 active comparator (%)                 | r | 0.679***       | 0.685***       | 0.776***        | 0.790***                |
| ASAS40 active comparator (%)                 | r | 0.740***       | 0.879***       | 0.913***        | 0.929***                |
| ASAS5/6 active comparator (%)                | r | n.s.           | 0.409***       | 0.635***        | 0.431***                |
| ASAS partial remission active comparator (%) | r | 0.901***       | 0.930***       | 0.925***        | 0.923***                |
| Participants in PBO group (n)                | r | n.s.           | n.s.           | 0.752***        | n.s.                    |
| Female (%)                                   | r | 0.348***       | n.s.           | n.s.            | n.s.                    |
| Mean age (years)                             | r | -0.510***      | n.s.           | n.s.            | -0.448***               |
| Caucasian (%)                                | r | n.s.           | 0.446***       | n.s.            | 0.428***                |
| Years since diagnosis                        | r | -0.772***      | -0.961***      | -0.961***       | -0.961***               |
| Years since symptoms                         | r | -0.665***      | -0.430***      | -0.564***       | -0.730***               |
| HLA-B27 positive (%)                         | r | 0.333***       | n.s.           | 0.370***        | n.s.                    |
| Concomitant NSAIDs (%)                       | r | n.s.           | n.s.           | -0.465***       | n.s.                    |
| Any concomitant DMARDs                       | r | n.s.           | -0.535***      | 0.385***        | -0.419***               |
| Prior anti-TNF (%)                           | r | n.s.           | n.s.           | -0.355***       | -0.332***               |
| Study duration (weeks)                       | r | 0.523***       | 0.799***       | 0.929***        | 0.728***                |
| Publication year                             | r | 0.646***       | 0.545***       | 0.587***        | 0.623***                |
